# Supplementary material for: Neuroprotective potential of fisetin in an experimental model of spinal cord injury: via modulation of NF-κB/IκBα pathway
Source: PubMed Central journal article supplement — Neuroreport. 2021 Jan 18;32(4):296–305. doi: 10.1097/WNR.0000000000001596 (PMC7886366; doi:10.1097/wnr.0000000000001596), 2021-01-18
Supplement: nr-32-296-s001.pdf [file nr-32-296-s001.pdf]

Supplementary Files

Supplementary File 1: Effect of fisetin on SCI induced alteration in testis, seminal vesicle, prostate gland, urinary bladder, epididymis, kidney weight, and sperm count

| Treatment                  | Normal        | Sham          | SCI Control                      | Methylprednisolone (30)       | Fisetin (10)  | Fisetin (20)                  | Fisetin (40)                  |
|----------------------------|---------------|---------------|----------------------------------|-------------------------------|---------------|-------------------------------|-------------------------------|
| Testis weight (g)          | 2.48 ± 0.11   | 2.40 ± 0.1.00 | 1.11 ± 0.11 <sup>#,&amp;</sup>   | 2.02 ± 0.07 <sup>*,\$</sup>   | 1.37 ± 0.08   | 1.56 ± 0.12 <sup>*,\$</sup>   | 1.90 ± 0.04 <sup>*,\$</sup>   |
| Seminal vesicle weight (g) | 2.40 ± 0.06   | 2.11 ± 0.09   | 1.19 ± 0.06 <sup>#,&amp;</sup>   | 2.15 ± 0.09 <sup>*,\$</sup>   | 1.27 ± 0.09   | 1.57 ± 0.10 <sup>*,\$</sup>   | 1.97 ± 0.06 <sup>*,\$</sup>   |
| Prostate gland weight (g)  | 0.51 ± 0.01   | 0.46 ± 0.01   | 0.26 ± 0.02 <sup>#,&amp;</sup>   | 0.42 ± 0.01 <sup>*,\$</sup>   | 0.29 ± 0.01   | 0.36 ± 0.01 <sup>*,\$</sup>   | 0.42 ± 0.02 <sup>*,\$</sup>   |
| Urinary bladder weight (g) | 0.40 ± 0.01   | 0.46 ± 0.01   | 1.20 ± 0.02 <sup>#,&amp;</sup>   | 0.62 ± 0.02 <sup>*,\$</sup>   | 1.10 ± 0.02   | 0.90 ± 0.02 <sup>*,\$</sup>   | 0.72 ± 0.02 <sup>*,\$</sup>   |
| Epididymis weight (g)      | 2.60 ± 0.07   | 2.44 ± 0.03   | 1.26 ± 0.06 <sup>#,&amp;</sup>   | 2.18 ± 0.06 <sup>*,\$</sup>   | 1.41 ± 0.05   | 1.98 ± 0.07 <sup>*,\$</sup>   | 2.26 ± 0.07 <sup>*,\$</sup>   |
| Kidney weight (g)          | 131.20 ± 2.57 | 123.00 ± 3.67 | 106.20 ± 3.16 <sup>#,&amp;</sup> | 118.20 ± 4.29 <sup>*,\$</sup> | 108.30 ± 3.21 | 114.70 ± 5.45 <sup>*,\$</sup> | 121.80 ± 4.09 <sup>*,\$</sup> |
| Sperm count (million/ml)   | 53.00 ± 2.00  | 49.67 ± 2.63  | 29.00 ± 2.05 <sup>#,&amp;</sup>  | 43.50 ± 1.93 <sup>*,\$</sup>  | 29.83 ± 3.09  | 36.33 ± 1.28 <sup>*,\$</sup>  | 47.67 ± 2.73 <sup>*,\$</sup>  |

Data are expressed as mean ± S.E.M (n=6) and one way ANOVA followed by Tukey's multiple range test. \**p* < 0.05 as compared with the SCI control group, #*p* < 0.05 as compared with sham group, &*p* < 0.05 as compared with normal and \$*p* < 0.05 as compared with one another.

**Graphical abstract:** Fisetin exert its neuroprotective effect via modulation of NF-κB/IκBα pathway in spinal cord Injury
