# Supplementary material for: Neuroprotective potential of fisetin in an experimental model of spinal cord injury: via modulation of NF-κB/IκBα pathway
Source: PubMed Central journal article supplement — Neuroreport. 2021 Jan 18;32(4):296–305. doi: 10.1097/WNR.0000000000001596 (PMC7886366; doi:10.1097/wnr.0000000000001596), 2021-01-18
Supplement: nr-32-296-s002.pdf [file nr-32-296-s002.pdf]

**Graphical abstract:** Fisetin exert its neuroprotective effect via modulation of NF- $\kappa$ B/I $\kappa$ B $\alpha$  pathway in spinal cord Injury

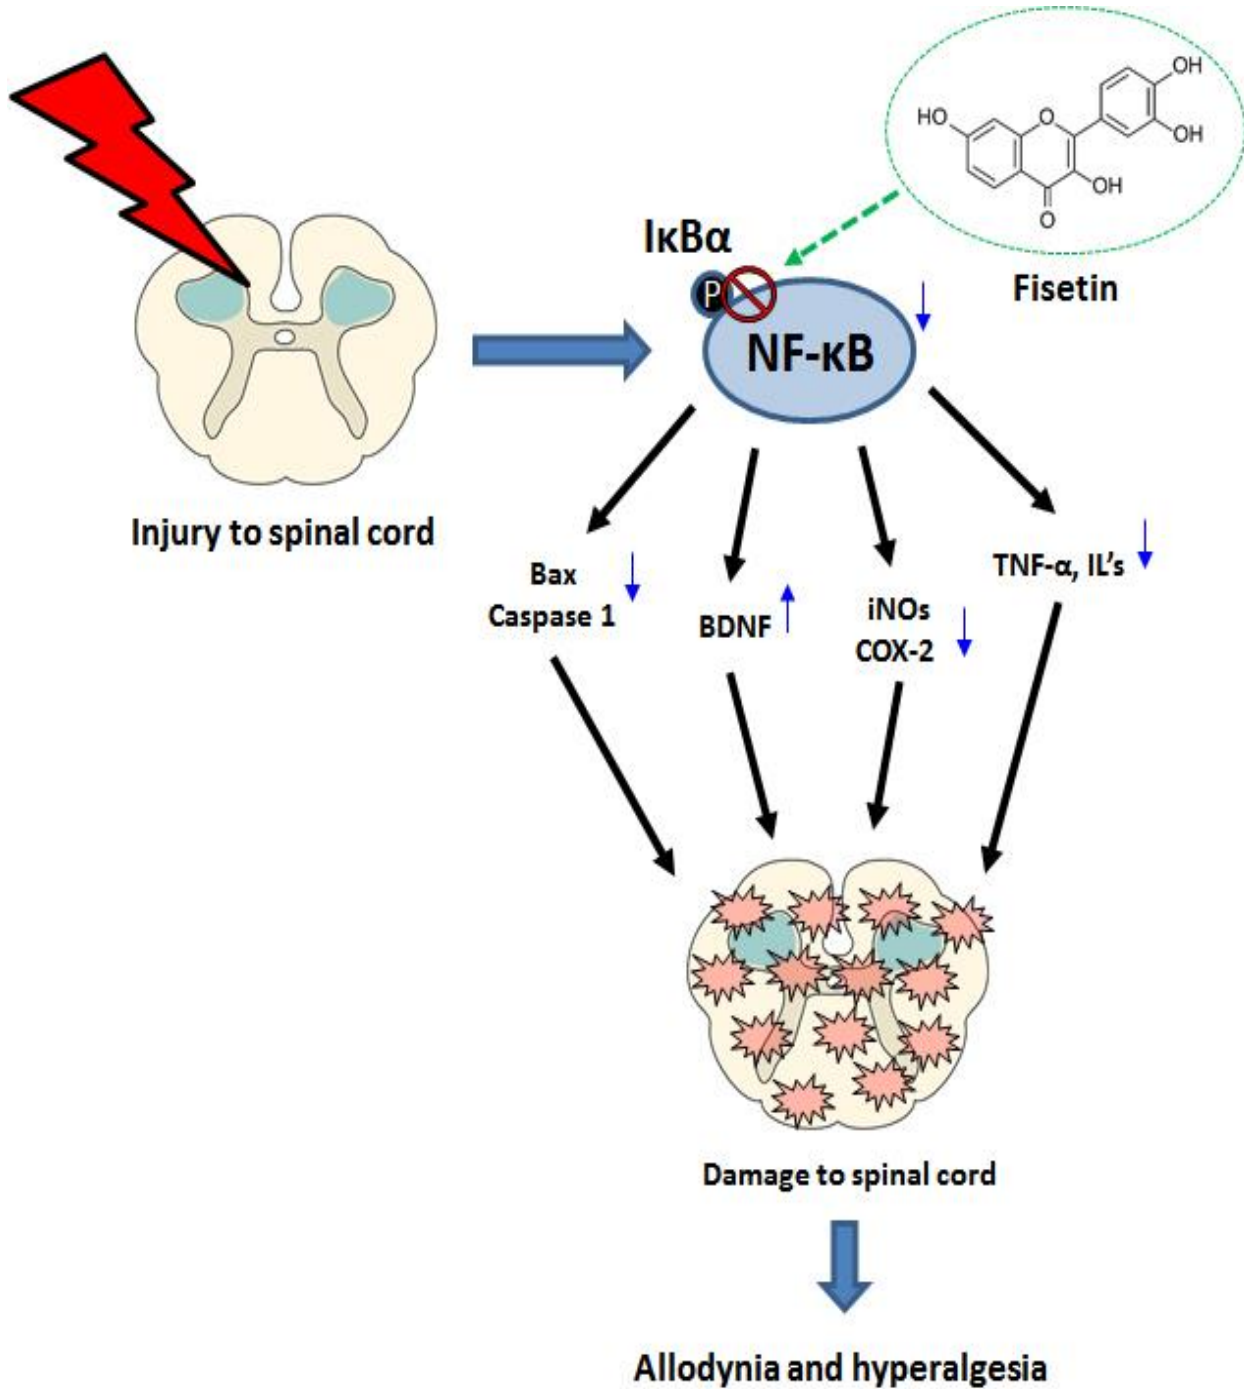

↓↑ Pathway for Fisetin to ameliorate Spinal Cord Injury
